# Supplementary material for: Calibration of a surface mass balance model for global-scale applications
Source: Copernicus journal article supplement (doi:10.5194/tc-6-1463-2012), 2012-12-07
Supplement: Supplementary file [file tc-6-1463-2012-supplement.pdf]

# Supplementary material to ‘Calibration of a surface mass balance model for global-scale applications’

R. H. Giesen and J. Oerlemans

This supplementary material contains information on the 82 glaciers that were used to examine the applicability of the mass balance model in different regions. We selected all glaciers for which both winter and annual mass balance profiles were available from the World Glacier Monitoring Service (WGMS). At the time the data was requested from WGMS (June 2010), the most recent year with available mass balance measurements was 2008. The characteristics and parameter values listed for all 82 glaciers are described in Table 1, the list of glaciers is given in Table 2.

**Table 1:** Description of variables listed for the 82 glaciers in Table 2.

| Variable            | Unit                               | Description                                                       |
|---------------------|------------------------------------|-------------------------------------------------------------------|
| lat                 | °N                                 | glacier latitude                                                  |
| lon                 | °E                                 | glacier longitude                                                 |
| #                   |                                    | number of years with both winter and annual mass balance profiles |
| period              |                                    | period of calendar years spanned by the available profiles        |
| ELA                 | m a.s.l.                           | equilibrium-line altitude                                         |
| $z_{\text{CRU}}$    | m a.s.l.                           | elevation of the nearest CRU climate data gridpoint               |
| $\gamma$            | mm a <sup>-1</sup> m <sup>-1</sup> | vertical precipitation gradient                                   |
| $p$                 |                                    | precipitation multiplication factor                               |
| $\tau$              |                                    | atmospheric transmissivity                                        |
| $\psi_{\text{min}}$ | W m <sup>-2</sup>                  | minimum temperature-dependent flux                                |
| $c$                 | W m <sup>-2</sup> K <sup>-1</sup>  | slope of the temperature-dependent flux                           |
| $T_{\text{tip}}$    | °C                                 | tipping point in the temperature-dependent flux equation          |
| $T_{\text{corr}}$   | °C                                 | air temperature correction                                        |
| $C_T$               | m w.e. K <sup>-1</sup>             | mass balance sensitivity to changes in temperature                |
| $C_P$               | m w.e. [10%] <sup>-1</sup>         | mass balance sensitivity to changes in precipitation              |
| $C_\tau$            | m w.e. [0.05] <sup>-1</sup>        | mass balance sensitivity to changes in atmospheric transmissivity |

**Table 2:** The 82 glaciers with winter and annual mass balance profiles available from WGMS. Given are the glacier name and all attributes described in Table 1. The values for  $\gamma$ ,  $p$ ,  $C_T$ ,  $C_P$  and  $C_\tau$  are the median values for the three calibration cases  $\tau$ -cal.,  $T$ -cal. and  $\psi$ -cal. The AWS parameter set used in combination with the calibrated parameters is given in brackets after the region name. This parameter set is used as a basis, combined with calibrated values for either  $\tau$  (case  $\tau$ -cal.), the parameters in the temperature-dependent flux  $\psi_{\min}$ ,  $c$  and  $T_{\text{tip}}$  (case  $\psi$ -cal.) or the temperature correction  $T_{\text{corr}}$  (case  $T$ -cal.).

| Glacier                                 | lat    | lon     | #  | period | ELA  | $z_{\text{CRU}}$ | $\gamma$ | $p$  | $\tau$ | $\psi_{\min}$ | $c$  | $T_{\text{tip}}$ | $T_{\text{corr}}$ | $-C_T$ | $C_P$ | $-C_\tau$ |
|-----------------------------------------|--------|---------|----|--------|------|------------------|----------|------|--------|---------------|------|------------------|-------------------|--------|-------|-----------|
| <i>Caucasus (Mort)</i>                  |        |         |    |        |      |                  |          |      |        |               |      |                  |                   |        |       |           |
| Tbilisa                                 | 43.13  | 42.47   | 13 | 68–80  | 3435 | 2123             | -3.0     | 6.4  | 0.53   | -105          | 50.5 | 5.0              | 1.1               | 0.69   | 0.43  | 0.52      |
| Djankuat                                | 43.20  | 42.77   | 38 | 68–05  | 3213 | 2777             | 1.5      | 3.6  | 0.46   | -25           | 19.0 | 6.6              | -0.2              | 0.72   | 0.43  | 0.44      |
| Garabashi                               | 43.30  | 42.47   | 22 | 84–05  | 3840 | 3148             | -1.5     | 2.4  | 0.33   | -100          | 64.0 | 7.2              | -2.4              | 0.48   | 0.29  | 0.48      |
| <i>Central Asia (Mort)</i>              |        |         |    |        |      |                  |          |      |        |               |      |                  |                   |        |       |           |
| Abramov                                 | 39.63  | 71.60   | 29 | 68–98  | 4231 | 3984             | 1.5      | 1.9  | 0.26   | -105          | 64.5 | 10.0             | -4.7              | 0.43   | 0.26  | 0.48      |
| Suyok Zapadny                           | 41.78  | 77.78   | 2  | 84–89  | 4280 | 3820             | 1.0      | 7.1  | 0.27   | -50           | 0.5  | -6.0             | -2.9              | 0.51   | 0.37  | 0.69      |
| No. 131                                 | 41.85  | 77.77   | 2  | 88–89  | 4258 | 3938             | -1.0     | 7.4  | 0.24   | -75           | 22.0 | 8.8              | -3.5              | 0.65   | 0.32  | 0.61      |
| No. 356 (Sary-Tor)                      | 41.83  | 78.18   | 5  | 85–89  | 4260 | 4214             | 2.0      | 6.6  | 0.17   | -75           | 0.0  | -5.0             | -4.2              | 0.35   | 0.24  | 0.52      |
| Golubin                                 | 42.47  | 74.50   | 10 | 81–90  | 3874 | 3540             | 1.0      | 2.0  | 0.17   | -100          | 69.5 | 11.4             | -7.4              | 0.34   | 0.16  | 0.42      |
| Ts. Tuyuksuyskiy                        | 43.05  | 77.08   | 40 | 65–07  | 3824 | 3068             | -1.0     | 6.7  | 0.19   | -100          | 64.0 | 10.0             | -4.2              | 0.54   | 0.20  | 0.45      |
| Shumskiy                                | 45.08  | 80.23   | 24 | 68–91  | 3728 | 3343             | -0.5     | 2.9  | 0.22   | -100          | 52.5 | 8.8              | -6.0              | 0.43   | 0.21  | 0.49      |
| Leviy Aktru                             | 50.08  | 87.72   | 7  | 88–95  | 3197 | 2747             | 0.5      | 4.3  | 0.32   | -75           | 59.5 | 8.2              | -2.9              | 0.36   | 0.20  | 0.34      |
| Praviy Aktru                            | 50.08  | 87.73   | 2  | 88–89  | 3110 | 2747             | 2.0      | 4.6  | 0.32   | -50           | 2.0  | -3.8             | -2.7              | 0.38   | 0.26  | 0.34      |
| Maliy Aktru                             | 50.08  | 87.75   | 12 | 88–00  | 3177 | 2747             | 1.0      | 3.5  | 0.30   | -80           | 18.0 | 5.2              | -3.5              | 0.35   | 0.20  | 0.34      |
| No. 125 (Vodopadny)                     | 50.10  | 87.70   | 12 | 88–00  | 3227 | 2747             | -0.5     | 2.8  | 0.18   | -100          | 29.5 | 8.0              | -8.1              | 0.44   | 0.18  | 0.48      |
| <i>New Zealand (Stor)</i>               |        |         |    |        |      |                  |          |      |        |               |      |                  |                   |        |       |           |
| Brewster Glacier                        | -44.07 | 169.43  | 4  | 05–08  | 1923 | 1058             | 0.5      | 2.9  | 0.36   | 0.0           | 2.0  | -1.0             | -1.1              | 1.35   | 0.63  | 0.54      |
| <i>Central Europe (Mort)</i>            |        |         |    |        |      |                  |          |      |        |               |      |                  |                   |        |       |           |
| Maladeta                                | 42.65  | 0.64    | 16 | 92–07  | 3112 | 2042             | 4.0      | 0.0  | 0.62   | -95           | 40.0 | 3.2              | 2.1               | 0.92   | 0.45  | 0.54      |
| Basodino                                | 46.42  | 8.48    | 2  | 06–07  | 2978 | 2289             | -0.5     | 1.6  | 0.52   | -100          | 17.5 | -2.0             | 0.6               | 0.84   | 0.32  | 0.64      |
| Careser                                 | 46.45  | 10.70   | 12 | 71–07  | 3282 | 2314             | -0.5     | 2.8  | 0.48   | -25           | 20.5 | 4.6              | 0.1               | 0.69   | 0.39  | 0.56      |
| Fontana Bianca                          | 46.48  | 10.77   | 12 | 96–07  | 3351 | 2314             | -2.0     | 4.1  | 0.58   | -25           | 2.00 | -13.0            | 1.7               | 0.81   | 0.44  | 0.64      |
| Rhonegletscher                          | 46.62  | 8.40    | 3  | 80–82  | 2891 | 2474             | 1.5      | 2.9  | 0.70   | 15            | 18.0 | 2.4              | 2.6               | 0.90   | 0.50  | 0.40      |
| Ochsentalergletscher                    | 46.85  | 10.10   | 4  | 92–95  | 2937 | 2214             | -0.5     | 3.1  | 0.61   | -25           | 2.5  | -12.0            | 1.4               | 0.89   | 0.46  | 0.51      |
| Vermuntgletscher                        | 46.85  | 10.13   | 5  | 91–95  | 3029 | 2214             | -2.5     | 3.3  | 0.51   | -50           | 36.0 | 3.6              | 0.5               | 0.96   | 0.38  | 0.63      |
| Jamtalferner                            | 46.87  | 10.17   | 13 | 91–07  | 2965 | 2368             | -1.5     | 2.7  | 0.52   | -25           | 23.5 | -3.8             | 0.7               | 0.91   | 0.38  | 0.57      |
| Malavalle                               | 46.95  | 11.12   | 1  | 05     | 3119 | 2376             | 4.0      | 0.0  | 0.49   | -50           | 3.00 | -10.6            | 0.40              | 0.56   | 0.31  | 0.51      |
| Pendente                                | 46.96  | 11.23   | 4  | 05–08  | 3002 | 2217             | 2.5      | 2.0  | 0.65   | -25           | 3.00 | -12.0            | 1.90              | 1.01   | 0.53  | 0.60      |
| Goldberg Kees                           | 47.03  | 12.47   | 6  | 01–07  | 2995 | 2424             | -2.5     | 3.4  | 0.55   | -25           | 2.0  | -12.6            | 0.7               | 0.92   | 0.44  | 0.53      |
| Wurten Kees                             | 47.04  | 13.01   | 24 | 83–07  | 3042 | 1910             | -2.5     | 4.2  | 0.59   | -25           | 2.5  | -10.6            | 1.5               | 0.93   | 0.51  | 0.60      |
| Kleinfleiss Kees                        | 47.05  | 12.95   | 6  | 01–07  | 2983 | 2118             | 1.5      | 1.6  | 0.58   | -75           | 22.0 | -0.4             | 1.3               | 0.93   | 0.36  | 0.52      |
| <i>Coast and Rocky Mountains (Mort)</i> |        |         |    |        |      |                  |          |      |        |               |      |                  |                   |        |       |           |
| South Cascade                           | 48.37  | -121.05 | 16 | 65–80  | 1970 | 1522             | 1.5      | 2.6  | 0.45   | -105          | 68.5 | 8.6              | -0.4              | 0.77   | 0.46  | 0.48      |
| Sentinel                                | 49.90  | -122.98 | 18 | 66–89  | 1828 | 1659             | 1.5      | 2.9  | 0.46   | -25           | 49.0 | 8.8              | -0.2              | 0.77   | 0.47  | 0.45      |
| Helm                                    | 49.97  | -123.00 | 8  | 82–89  | 2090 | 1659             | 2.0      | 1.5  | 0.40   | -45           | 38.0 | 7.6              | -1.0              | 0.74   | 0.35  | 0.52      |
| Place                                   | 50.43  | -122.60 | 21 | 65–95  | 2266 | 1551             | 1.0      | 2.2  | 0.40   | -25           | 11.0 | 6.6              | -1.3              | 0.63   | 0.35  | 0.48      |
| Zavisha                                 | 50.80  | -123.42 | 5  | 81–85  | 2282 | 1794             | 0.5      | 2.3  | 0.37   | -25           | 2.0  | -2.4             | -1.8              | 0.58   | 0.40  | 0.48      |
| Bridge                                  | 50.82  | -123.57 | 5  | 81–85  | 2207 | 1568             | 1.0      | 2.1  | 0.37   | -110          | 26.0 | 4.6              | -1.6              | 0.51   | 0.29  | 0.42      |
| Sykora                                  | 50.87  | -123.58 | 5  | 81–85  | 2188 | 2047             | 1.0      | 2.5  | 0.29   | -100          | 31.5 | 6.8              | -2.7              | 0.52   | 0.28  | 0.40      |
| Woolsey                                 | 51.12  | -118.62 | 9  | 66–74  | 2268 | 1471             | 3.0      | 1.3  | 0.45   | -25           | 2.5  | -8.8             | -0.2              | 0.63   | 0.40  | 0.42      |
| Tiedemann                               | 51.33  | -125.05 | 5  | 81–85  | 1954 | 1343             | 0.0      | 3.0  | 0.35   | -25           | 70.0 | 14.2             | -2.2              | 0.62   | 0.34  | 0.45      |
| Bench                                   | 51.43  | -124.92 | 5  | 81–85  | 1893 | 1544             | 1.5      | 2.0  | 0.29   | -25           | 70.0 | 14.0             | -3.5              | 0.52   | 0.32  | 0.45      |
| Peyto                                   | 51.67  | -116.53 | 27 | 66–95  | 2720 | 2267             | 2.0      | 1.1  | 0.33   | -100          | 55.0 | 7.2              | -3.2              | 0.44   | 0.24  | 0.45      |
| Ram River                               | 51.85  | -116.48 | 8  | 66–74  | 2838 | 2151             | 2.5      | 0.1  | 0.27   | -50           | 40.0 | 11.4             | -5.2              | 0.35   | 0.29  | 0.43      |
| Andrei                                  | 56.93  | -130.97 | 4  | 81–84  | 1519 | 1181             | 1.5      | 2.0  | 0.31   | -25           | 27.0 | 11.2             | -2.5              | 0.55   | 0.31  | 0.40      |
| Yuri                                    | 56.97  | -130.68 | 4  | 81–84  | 1817 | 1161             | 1.0      | 1.3  | 0.33   | -50           | 2.50 | -5.6             | -3.0              | 0.44   | 0.30  | 0.43      |
| Alexander                               | 57.10  | -130.82 | 4  | 81–84  | 1737 | 1220             | 1.0      | 2.2  | 0.37   | -25           | 2.0  | -4.8             | -1.5              | 0.58   | 0.37  | 0.46      |
| <i>Kamchatka (Stor)</i>                 |        |         |    |        |      |                  |          |      |        |               |      |                  |                   |        |       |           |
| Kozelskiy Glacier                       | 53.23  | 158.82  | 8  | 88–95  | 1351 | 1118             | 2.0      | 4.8  | 0.81   | 20            | 2.5  | -16.8            | 4.10              | 0.80   | 0.56  | 0.35      |
| Koryto Glacier                          | 54.68  | 161.00  | 2  | 96–97  | 646  | 511              | 9.0      | 10.0 | 0.71   | 0             | 17.0 | 2.4              | 2.4               | 0.91   | 0.77  | 0.37      |
| <i>Scandinavia (Stor)</i>               |        |         |    |        |      |                  |          |      |        |               |      |                  |                   |        |       |           |
| Bondhusbreen                            | 60.03  | 6.33    | 4  | 77–80  | 1513 | 901              | 3.5      | 1.6  | 0.49   | -80           | 18.5 | -0.2             | -0.1              | 0.91   | 0.37  | 0.39      |
| Breidalblikkbrea                        | 60.10  | 6.40    | 3  | 03–05  | 1528 | 1253             | -0.5     | 4.5  | 0.57   | 0             | 4.50 | -2.8             | 0.8               | 0.97   | 0.46  | 0.46      |
| Gräffjellsbrea                          | 60.10  | 6.40    | 3  | 03–05  | 1482 | 1253             | 4.5      | 3.3  | 0.52   | 0             | 2.5  | -6.2             | 0.4               | 0.93   | 0.41  | 0.44      |
| Rembesdalsskåka                         | 60.53  | 7.37    | 23 | 71–05  | 1663 | 1514             | 3.5      | 2.8  | 0.44   | -25           | 11.0 | 1.6              | -0.5              | 0.69   | 0.32  | 0.30      |
| Jostefon                                | 61.43  | 6.55    | 3  | 96–98  | 1303 | 1514             | 0.5      | 2.4  | 0.45   | 0             | 5.5  | 2.2              | -0.2              | 0.84   | 0.39  | 0.41      |
| Vestre Memurubreen                      | 61.53  | 8.45    | 5  | 68–72  | 1942 | 1684             | 2.0      | 1.7  | 0.38   | -25           | 1.5  | -5.2             | -1.5              | 0.53   | 0.32  | 0.39      |
| Austre Memurubreen                      | 61.55  | 8.50    | 5  | 68–72  | 2025 | 1700             | 1.5      | 1.7  | 0.42   | -25           | 7.0  | 0.6              | -1.0              | 0.52   | 0.30  | 0.40      |
| Storbreen                               | 61.57  | 8.13    | 16 | 90–05  | 1773 | 1466             | 2.5      | 1.9  | 0.38   | -25           | 2.5  | -3.8             | -1.3              | 0.52   | 0.29  | 0.34      |
| Hellstugubreen                          | 61.57  | 8.43    | 30 | 71–05  | 1921 | 1684             | 2.5      | 1.5  | 0.32   | -20           | 70   | 8.8              | -2.3              | 0.43   | 0.26  | 0.34      |

Table 2: (continued)

| Glacier              | lat   | lon    | #  | period | ELA  | $z_{CRU}$ | $\gamma$ | $p$ | $\tau$ | $\psi_{min}$ | $c$  | $T_{tip}$ | $T_{corr}$ | $-C_T$ | $C_P$ | $-C_\tau$ |
|----------------------|-------|--------|----|--------|------|-----------|----------|-----|--------|--------------|------|-----------|------------|--------|-------|-----------|
| Tunsbergdalsbreen    | 61.60 | 7.05   | 7  | 66–72  | 1449 | 1250      | 2.0      | 2.5 | 0.35   | -25          | 6.5  | 2.0       | -1.7       | 0.57   | 0.31  | 0.35      |
| Spørteggbreen        | 61.61 | 7.47   | 1  | 91     | 1528 | 1298      | 2.0      | 1.5 | 0.21   | -50          | 1.5  | -2.6      | -3.6       | 0.45   | 0.24  | 0.32      |
| Gråsubreen           | 61.65 | 8.60   | 30 | 71–05  | 2147 | 1700      | -2.0     | 2.0 | 0.31   | -75          | 35.5 | 2.8       | -3.2       | 0.54   | 0.23  | 0.41      |
| Nigardsbreen         | 61.72 | 7.13   | 32 | 71–07  | 1507 | 1396      | 2.0      | 2.5 | 0.40   | -25          | 21.0 | 4.6       | -0.7       | 0.66   | 0.33  | 0.31      |
| Ålftobreen           | 61.75 | 5.65   | 36 | 65–05  | 1163 | 727       | -0.5     | 3.1 | 0.59   | 0            | 5.0  | -2.0      | 1.0        | 1.05   | 0.53  | 0.37      |
| Hansebreen           | 61.75 | 5.68   | 11 | 91–05  | 1178 | 807       | 3.0      | 2.5 | 0.55   | 0            | 7.5  | 0.6       | 0.7        | 1.07   | 0.52  | 0.42      |
| Austdalsbreen        | 61.80 | 7.35   | 13 | 88–05  | 1478 | 1330      | 5.0      | 2.6 | 0.34   | -25          | 67.5 | 7.8       | -1.4       | 0.69   | 0.32  | 0.34      |
| Okstindbreen         | 66.23 | 14.37  | 7  | 90–96  | 1345 | 556       | 3.5      | 0.5 | 0.49   | -105         | 20.5 | -1.6      | 0.1        | 0.59   | 0.32  | 0.30      |
| Høgtuvbreen          | 66.45 | 13.65  | 7  | 71–77  | 847  | 653       | 3.0      | 2.4 | 0.46   | 0            | 11.5 | 4.0       | -0.2       | 0.82   | 0.43  | 0.36      |
| Svartisheibreen      | 66.55 | 13.77  | 4  | 91–94  | 975  | 866       | 1.5      | 2.5 | 0.41   | -25          | 65.0 | 7.0       | -0.8       | 0.74   | 0.38  | 0.31      |
| Engabreen            | 66.65 | 13.85  | 30 | 71–05  | 1095 | 838       | 5.0      | 1.8 | 0.49   | 0            | 14.5 | 4.6       | 0.1        | 0.73   | 0.40  | 0.30      |
| Storglombreen        | 66.67 | 14.00  | 5  | 88–05  | 1274 | 707       | 6.0      | 0.7 | 0.52   | 0            | 46.5 | 6.2       | 0.4        | 0.78   | 0.37  | 0.37      |
| Trollbergdalsbreen   | 66.72 | 14.45  | 10 | 70–94  | 1094 | 987       | 2.5      | 2.5 | 0.46   | 0            | 20.5 | 5.6       | -0.3       | 0.77   | 0.37  | 0.37      |
| Partejekna           | 67.17 | 17.67  | 4  | 97–00  | 1703 | 1137      | 1.0      | 4.0 | 0.40   | -25          | 2.0  | -9.4      | -0.9       | 0.58   | 0.30  | 0.34      |
| Rabots Glaciär       | 67.90 | 18.55  | 15 | 86–06  | 1442 | 1245      | 5.5      | 3.0 | 0.36   | -25          | 1.5  | -8.2      | -1.5       | 0.48   | 0.26  | 0.32      |
| Storglaciären        | 67.90 | 18.57  | 32 | 71–07  | 1486 | 1245      | 10       | 2.0 | 0.42   | -25          | 2.5  | -8.2      | -0.4       | 0.52   | 0.30  | 0.31      |
| Tarfalaglaciären     | 67.93 | 18.65  | 7  | 00–07  | 1514 | 1245      | 0.5      | 4.5 | 0.52   | 0            | 1.5  | -5.2      | 0.4        | 0.65   | 0.36  | 0.36      |
| Riukojietna          | 68.08 | 18.08  | 10 | 96–07  | 1381 | 1153      | -0.5     | 3.4 | 0.43   | -25          | 32.0 | 5.2       | -0.6       | 0.63   | 0.26  | 0.37      |
| Cainhavarre          | 68.10 | 18.00  | 4  | 65–68  | 1347 | 1153      | 0.0      | 3.7 | 0.39   | -25          | 2.0  | -7.8      | -1.0       | 0.58   | 0.30  | 0.33      |
| Storsteinsfjellbreen | 68.22 | 17.92  | 9  | 65–95  | 1317 | 1019      | 4.0      | 2.0 | 0.37   | -25          | 1.5  | -9.2      | -1.1       | 0.49   | 0.27  | 0.27      |
| Bläisen              | 68.33 | 17.85  | 4  | 65–68  | 1063 | 1019      | 6.5      | 3.6 | 0.27   | -25          | 1.5  | -1.8      | -2.4       | 0.50   | 0.27  | 0.33      |
| Marmaglaciären       | 68.83 | 18.67  | 14 | 95–08  | 1616 | 749       | 2.5      | 0.0 | 0.48   | -25          | 5.5  | -3.0      | 0.0        | 0.48   | 0.27  | 0.35      |
| Langfjordjøkelen     | 70.12 | 21.77  | 9  | 91–05  | 889  | 548       | 2.5      | 4.6 | 0.50   | 0            | 6.0  | 1.0       | 0.2        | 0.74   | 0.34  | 0.35      |
| <i>Arctic (Kong)</i> |       |        |    |        |      |           |          |     |        |              |      |           |            |        |       |           |
| Devon Ice Cap        | 75.42 | -83.25 | 3  | 96–98  | 1125 | 1489      | 0.0      | 0.8 | 0.20   | -75          | 0.0  | -11.4     | -7.3       | 0.16   | 0.06  | 0.16      |
| Hansbreen            | 77.08 | 15.67  | 15 | 91–07  | 364  | 299       | 2.5      | 4.2 | 0.35   | -30          | 0.0  | -9.0      | -1.8       | 0.53   | 0.20  | 0.26      |
| Kongsvegen           | 78.80 | 12.98  | 8  | 00–07  | 591  | 540       | 2.0      | 2.1 | 0.42   | -35          | 1.0  | -2.4      | -1.2       | 0.43   | 0.15  | 0.22      |
| Austre Brøggerbreen  | 78.88 | 11.83  | 5  | 90–95  | 428  | 215       | 1.5      | 2.1 | 0.38   | -30          | 40.0 | 6.8       | -1.6       | 0.51   | 0.18  | 0.27      |
| Midtre Lovénbreen    | 78.88 | 12.07  | 8  | 00–07  | 451  | 217       | 2.0      | 1.8 | 0.39   | -35          | 0.5  | 0.4       | -1.6       | 0.50   | 0.16  | 0.27      |
